# Supplementary material for: Assessing soil fertilization effects using time-lapse electromagnetic induction
Source: Copernicus journal article supplement (doi:10.5194/egusphere-2024-2889), 2024-10-10
Supplement: Supplementary file 1 [file egusphere-2024-2889-supplement.pdf]

SUPPLEMENTARY DATA

Table S1: Table of significant differences of each treatment's EMI configuration (column) relative to the control plot on the same time (row). The values indicate the *p* values and are coloured whereas dark green differs highly significantly (*p*<0.001), light green differs significantly (*p*<0.05) and yellow differs low significantly (*p*<0.2). The colors for orange (*p*<0.5) light red (*p*<0.9) and dark red (*p*>0.9) are used to highlight nonsignificant differences.

| DAF | Na    |       |       |       |       |       | Nb    |       |       |       |       |       | Nc    |       |       |       |       |       | KCl <sub>a</sub> |       |       |       |       |       | KCl <sub>b</sub> |       |       |       |       |       | KCl <sub>c</sub> |       |       |       |       |       |
|-----|-------|-------|-------|-------|-------|-------|-------|-------|-------|-------|-------|-------|-------|-------|-------|-------|-------|-------|------------------|-------|-------|-------|-------|-------|------------------|-------|-------|-------|-------|-------|------------------|-------|-------|-------|-------|-------|
|     | VCP 1 | VCP 2 | VCP 3 | HCP 1 | HCP 2 | HCP 3 | VCP 1 | VCP 2 | VCP 3 | HCP 1 | HCP 2 | HCP 3 | VCP 1 | VCP 2 | VCP 3 | HCP 1 | HCP 2 | HCP 3 | VCP 1            | VCP 2 | VCP 3 | HCP 1 | HCP 2 | HCP 3 | VCP 1            | VCP 2 | VCP 3 | HCP 1 | HCP 2 | HCP 3 | VCP 1            | VCP 2 | VCP 3 | HCP 1 | HCP 2 | HCP 3 |
| 0   | 0.37  | 1.00  | 0.99  | 1.00  | 1.00  | 0.96  | 1.00  | 1.00  | 1.00  | 1.00  | 1.00  | 1.00  | 1.00  | 1.00  | 1.00  | 0.90  | 1.00  | 1.00  | 0.95             | 1.00  | 0.77  | 0.67  | 0.32  | 0.95  | 0.81             | 0.82  | 1.00  | 0.98  | 0.99  | 0.54  | 0.84             | 0.44  | 1.00  | 0.66  | 0.30  |       |
| 8   | 0.37  | 0.39  | 0.54  | 0.53  | 0.98  | 0.98  | 0.20  | 0.41  | 0.79  | 0.61  | 0.99  | 0.99  | 0.00  | 0.00  | 0.00  | 0.00  | 0.02  | 0.01  | 0.12             | 0.27  | 0.38  | 0.70  | 0.97  | 1.00  | 0.00             | 0.00  | 0.00  | 0.01  | 1.00  | 0.12  | 0.00             | 0.00  | 0.00  | 0.00  | 1.00  |       |
| 21  | 0.43  | 0.45  | 0.41  | 0.55  | 0.99  | 0.99  | 0.08  | 0.04  | 0.17  | 0.10  | 0.10  | 0.96  | 0.00  | 0.00  | 0.00  | 0.00  | 0.00  | 0.01  | 0.09             | 0.16  | 0.12  | 0.09  | 0.78  | 1.00  | 0.00             | 0.00  | 0.00  | 0.00  | 1.00  | 0.09  | 0.00             | 0.00  | 0.00  | 0.00  | 1.00  |       |
| 35  | 0.63  | 0.65  | 0.54  | 0.61  | 0.74  | 0.97  | 0.02  | 0.02  | 0.02  | 0.06  | 0.01  | 0.86  | 0.00  | 0.00  | 0.00  | 0.00  | 0.00  | 0.15  | 0.14             | 0.14  | 0.16  | 0.11  | 0.93  | 0.93  | 0.00             | 0.00  | 0.00  | 0.00  | 1.00  | 0.16  | 0.00             | 0.00  | 0.00  | 0.00  | 0.98  |       |
| 46  | 0.59  | 0.71  | 0.59  | 0.33  | 0.79  | 0.96  | 0.02  | 0.02  | 0.01  | 0.00  | 0.01  | 1.00  | 0.00  | 0.00  | 0.00  | 0.00  | 0.00  | 0.22  | 0.19             | 0.15  | 0.24  | 0.39  | 1.00  | 0.97  | 0.00             | 0.00  | 0.00  | 0.00  | 1.00  | 0.13  | 0.00             | 0.00  | 0.00  | 0.00  | 0.99  |       |
| 49  | 0.71  | 0.87  | 0.65  | 0.55  | 0.96  | 0.99  | 0.05  | 0.01  | 0.02  | 0.01  | 0.01  | 0.94  | 0.00  | 0.00  | 0.00  | 0.00  | 0.00  | 0.13  | 0.09             | 0.13  | 0.18  | 0.26  | 0.97  | 0.97  | 0.00             | 0.00  | 0.00  | 0.00  | 1.00  | 0.07  | 0.00             | 0.00  | 0.00  | 0.00  | 0.99  |       |
| 59  | 0.59  | 0.57  | 0.46  | 0.92  | 0.95  | 0.97  | 0.01  | 0.02  | 0.05  | 0.02  | 0.05  | 0.52  | 0.00  | 0.00  | 0.00  | 0.00  | 0.00  | 0.02  | 0.12             | 0.15  | 0.14  | 0.07  | 0.99  | 1.00  | 0.00             | 0.00  | 0.00  | 0.01  | 0.98  | 0.24  | 0.00             | 0.00  | 0.00  | 0.00  | 0.79  |       |
| 66  | 0.95  | 0.94  | 0.93  | 0.83  | 1.00  | 0.98  | 0.07  | 0.04  | 0.08  | 0.01  | 0.41  | 0.97  | 0.00  | 0.00  | 0.00  | 0.00  | 0.00  | 0.20  | 0.31             | 0.32  | 0.15  | 0.48  | 1.00  | 0.94  | 0.00             | 0.00  | 0.00  | 0.03  | 0.81  | 0.06  | 0.00             | 0.00  | 0.00  | 0.32  | 0.99  |       |
| 78  | 1.00  | 1.00  | 0.99  | 1.00  | 0.73  | 1.00  | 0.75  | 0.95  | 0.99  | 0.92  | 1.00  | 1.00  | 0.00  | 0.00  | 0.00  | 0.00  | 0.00  | 0.00  | 0.72             | 0.63  | 0.56  | 0.67  | 0.68  | 0.96  | 0.04             | 0.01  | 0.15  | 0.04  | 1.00  | 0.28  | 0.00             | 0.00  | 0.00  | 0.00  | 0.10  |       |
| 84  | 0.99  | 1.00  | 0.71  | 1.00  | 0.52  | 1.00  | 0.88  | 1.00  | 0.95  | 1.00  | 1.00  | 1.00  | 0.00  | 0.00  | 0.00  | 0.00  | 0.01  | 0.01  | 0.34             | 0.72  | 0.90  | 0.88  | 0.48  | 0.78  | 0.01             | 0.04  | 0.54  | 0.15  | 1.00  | 0.91  | 0.00             | 0.00  | 0.00  | 0.00  | 0.27  |       |
| 91  | 0.77  | 0.98  | 1.00  | 0.95  | 1.00  | 1.00  | 0.04  | 0.08  | 0.15  | 0.12  | 0.17  | 1.00  | 0.00  | 0.00  | 0.00  | 0.00  | 0.00  | 0.39  | 0.24             | 0.13  | 0.15  | 0.19  | 0.99  | 1.00  | 0.00             | 0.00  | 0.00  | 0.01  | 0.99  | 0.17  | 0.00             | 0.00  | 0.00  | 0.00  | 1.00  |       |
| 102 | 0.55  | 0.70  | 0.50  | 0.77  | 0.35  | 0.66  | 0.01  | 0.02  | 0.02  | 0.00  | 0.00  | 0.87  | 0.00  | 0.00  | 0.00  | 0.00  | 0.00  | 0.00  | 0.10             | 0.11  | 0.17  | 0.22  | 0.70  | 1.00  | 0.00             | 0.00  | 0.00  | 0.00  | 0.56  | 0.94  | 0.00             | 0.00  | 0.00  | 0.00  | 1.00  |       |
| 108 | 0.79  | 0.81  | 0.60  | 0.77  | 0.33  | 0.60  | 0.01  | 0.01  | 0.02  | 0.01  | 0.00  | 0.58  | 0.00  | 0.00  | 0.00  | 0.00  | 0.00  | 0.00  | 0.06             | 0.09  | 0.13  | 0.27  | 0.28  | 1.00  | 0.00             | 0.00  | 0.00  | 0.00  | 0.74  | 0.90  | 0.00             | 0.00  | 0.00  | 0.00  | 0.99  |       |
| 115 | 0.60  | 0.64  | 0.56  | 0.55  | 0.67  | 0.84  | 0.00  | 0.01  | 0.01  | 0.01  | 0.00  | 0.66  | 0.00  | 0.00  | 0.00  | 0.00  | 0.00  | 0.00  | 0.15             | 0.17  | 0.17  | 0.13  | 0.38  | 1.00  | 0.00             | 0.00  | 0.00  | 0.01  | 0.88  | 0.79  | 0.00             | 0.00  | 0.00  | 0.00  | 1.00  |       |
| 123 | 0.61  | 0.63  | 0.59  | 0.50  | 0.49  | 0.51  | 0.00  | 0.01  | 0.01  | 0.00  | 0.00  | 0.47  | 0.00  | 0.00  | 0.00  | 0.00  | 0.00  | 0.00  | 0.12             | 0.21  | 0.13  | 0.20  | 0.25  | 1.00  | 0.00             | 0.00  | 0.00  | 0.00  | 0.75  | 0.96  | 0.00             | 0.00  | 0.00  | 0.00  | 0.08  |       |
| 135 | 0.90  | 0.82  | 0.79  | 0.83  | 0.88  | 0.56  | 0.01  | 0.01  | 0.01  | 0.00  | 0.00  | 0.42  | 0.00  | 0.00  | 0.00  | 0.00  | 0.00  | 0.08  | 0.02             | 0.05  | 0.07  | 0.13  | 0.93  | 1.00  | 0.00             | 0.00  | 0.00  | 0.04  | 1.00  | 0.66  | 0.00             | 0.00  | 0.00  | 0.00  | 0.99  |       |
| 193 | 0.79  | 0.87  | 0.82  | 0.90  | 0.98  | 0.84  | 0.02  | 0.01  | 0.01  | 0.08  | 0.00  | 0.63  | 0.00  | 0.00  | 0.00  | 0.00  | 0.00  | 0.01  | 0.26             | 0.22  | 0.24  | 0.19  | 0.77  | 1.00  | 0.07             | 0.01  | 0.01  | 0.03  | 0.96  | 0.91  | 0.00             | 0.00  | 0.00  | 0.00  | 0.90  |       |
| 310 | 1.00  | 0.95  | 0.99  | 1.00  | 1.00  | 1.00  | 0.95  | 0.99  | 0.98  | 1.00  | 0.95  | 0.86  | 0.88  | 0.00  | 0.00  | 0.00  | 0.00  | 0.00  | 0.99             | 0.37  | 0.41  | 0.36  | 0.32  | 0.35  | 0.98             | 0.95  | 0.89  | 0.97  | 0.94  | 0.97  | 0.99             | 0.00  | 0.00  | 0.00  | 0.00  |       |
| 400 | 0.14  | 0.62  | 0.84  | 0.90  | 1.00  | 0.77  | 0.82  | 0.93  | 0.94  | 0.54  | 0.74  | 0.87  | 0.00  | 0.00  | 0.00  | 0.00  | 0.00  | 0.00  | 0.39             | 0.21  | 0.20  | 0.99  | 0.69  | 0.69  | 0.04             | 0.01  | 0.01  | 0.02  | 0.06  | 0.97  | 0.00             | 0.00  | 0.00  | 0.00  | 0.00  |       |
| 465 | 0.98  | 0.93  | 0.87  | 0.95  | 1.00  | 0.98  | 0.87  | 0.99  | 1.00  | 1.00  | 1.00  | 1.00  | 0.00  | 0.00  | 0.00  | 0.00  | 0.00  | 0.00  | 0.99             | 0.81  | 0.73  | 0.65  | 0.73  | 0.82  | 0.22             | 0.11  | 0.08  | 0.89  | 0.49  | 0.98  | 0.00             | 0.00  | 0.00  | 0.00  | 0.00  |       |

**Table S2: Table of significant differences of each treatment's ERT depth (column) relative to the control plot on the same time (row). The values indicate the p values and are coloured whereas dark green differs highly significantly ( $p < 0.001$ ), light green differs significantly ( $p < 0.05$ ) and yellow differs low significantly ( $p < 0.2$ ). The colors for orange ( $p < 0.5$ ) light red ( $p < 0.9$ ) and dark red ( $p > 0.9$ ) are used to highlight nonsignificant differences.**

| DAF | Na   |      |      |      |      |      |      | Nb   |      |      |      |      |      |      | Nc   |      |      |      |      |      |      | KCl  |      |      |      |      |      |      | KClb |      |      |      |      |      |      | KCLc |      |      |      |      |      |      |      |    |    |    |    |    |
|-----|------|------|------|------|------|------|------|------|------|------|------|------|------|------|------|------|------|------|------|------|------|------|------|------|------|------|------|------|------|------|------|------|------|------|------|------|------|------|------|------|------|------|------|----|----|----|----|----|
|     | 10   | 20   | 30   | 40   | 60   | 80   | 100  | 10   | 20   | 30   | 40   | 60   | 80   | 100  | 10   | 20   | 30   | 40   | 60   | 80   | 100  | 10   | 20   | 30   | 40   | 60   | 80   | 100  | 10   | 20   | 30   | 40   | 60   | 80   | 100  | 10   | 20   | 30   | 40   | 60   | 80   | 100  | 10   | 20 | 30 | 40 | 60 | 80 |
| 0   | 0.52 | 0.80 | 1.00 | 1.00 | 1.00 | 1.00 | 1.00 | 0.74 | 1.00 | 0.76 | 0.95 | 1.00 | 1.00 | 0.99 | 0.99 | 1.00 | 1.00 | 1.00 | 1.00 | 1.00 | 1.00 | 0.99 | 1.00 | 1.00 | 0.87 | 0.97 | 1.00 | 1.00 | 1.00 | 0.16 | 0.22 | 0.97 | 1.00 | 1.00 | 1.00 | 0.98 | 0.99 | 1.00 | 0.88 | 0.95 | 0.99 | 0.96 | 0.65 |    |    |    |    |    |
| 36  | 0.41 | 0.05 | 0.00 | 0.01 | 0.34 | 0.28 | 0.03 | 0.04 | 0.00 | 0.00 | 0.00 | 0.02 | 0.14 | 0.06 | 0.00 | 0.00 | 0.00 | 0.00 | 0.00 | 0.00 | 0.00 | 0.00 | 0.01 | 0.00 | 0.00 | 0.00 | 0.71 | 1.00 | 0.78 | 0.00 | 0.00 | 0.00 | 0.00 | 0.29 | 0.92 | 0.63 | 0.00 | 0.00 | 0.00 | 0.00 | 0.00 | 0.00 | 0.00 |    |    |    |    |    |
| 66  | 1.00 | 0.96 | 0.80 | 1.00 | 1.00 | 1.00 | 1.00 | 0.28 | 0.03 | 0.01 | 0.17 | 0.90 | 1.00 | 0.95 | 0.00 | 0.00 | 0.00 | 0.00 | 0.00 | 0.00 | 0.00 | 0.00 | 0.25 | 0.01 | 0.00 | 0.23 | 1.00 | 1.00 | 1.00 | 0.06 | 0.00 | 0.00 | 0.08 | 0.92 | 1.00 | 1.00 | 0.00 | 0.00 | 0.00 | 0.00 | 0.00 | 0.00 | 0.00 |    |    |    |    |    |
| 102 | 1.00 | 0.68 | 0.28 | 0.26 | 0.38 | 0.06 | 0.00 | 0.09 | 0.00 | 0.00 | 0.00 | 0.00 | 0.00 | 0.00 | 0.00 | 0.00 | 0.00 | 0.00 | 0.00 | 0.00 | 0.00 | 0.00 | 0.32 | 0.00 | 0.00 | 0.00 | 0.00 | 0.00 | 0.00 | 0.07 | 0.00 | 0.00 | 0.00 | 0.00 | 0.00 | 0.00 | 0.00 | 0.00 | 0.00 | 0.00 | 0.00 | 0.00 | 0.00 |    |    |    |    |    |
| 135 | 0.97 | 0.35 | 0.15 | 0.15 | 0.10 | 0.00 | 0.00 | 0.10 | 0.00 | 0.00 | 0.00 | 0.00 | 0.00 | 0.00 | 0.00 | 0.00 | 0.00 | 0.00 | 0.00 | 0.00 | 0.00 | 0.00 | 0.15 | 0.00 | 0.00 | 0.00 | 0.00 | 0.00 | 0.00 | 0.02 | 0.00 | 0.00 | 0.00 | 0.00 | 0.00 | 0.00 | 0.00 | 0.00 | 0.00 | 0.00 | 0.00 | 0.00 | 0.00 |    |    |    |    |    |
| 193 | 0.55 | 0.36 | 0.25 | 0.29 | 0.27 | 0.06 | 0.00 | 0.77 | 0.03 | 0.00 | 0.00 | 0.00 | 0.00 | 0.00 | 0.00 | 0.00 | 0.00 | 0.00 | 0.00 | 0.00 | 0.00 | 0.00 | 0.01 | 0.00 | 0.00 | 0.00 | 0.00 | 0.00 | 0.00 | 0.29 | 0.00 | 0.00 | 0.00 | 0.00 | 0.00 | 0.00 | 0.00 | 0.00 | 0.00 | 0.00 | 0.00 | 0.00 | 0.00 |    |    |    |    |    |
| 310 | 0.95 | 1.00 | 1.00 | 1.00 | 1.00 | 1.00 | 0.92 | 0.00 | 0.00 | 0.23 | 0.93 | 1.00 | 0.98 | 0.55 | 1.00 | 0.15 | 0.00 | 0.00 | 0.00 | 0.00 | 0.00 | 0.00 | 0.08 | 0.39 | 1.00 | 1.00 | 1.00 | 0.88 | 0.64 | 0.08 | 0.63 | 1.00 | 1.00 | 0.87 | 0.57 | 0.65 | 0.84 | 0.82 | 0.02 | 0.00 | 0.00 | 0.00 | 0.00 |    |    |    |    |    |
| 400 | 1.00 | 1.00 | 1.00 | 1.00 | 1.00 | 1.00 | 1.00 | 0.09 | 0.38 | 0.87 | 0.98 | 1.00 | 1.00 | 0.96 | 0.20 | 0.00 | 0.00 | 0.00 | 0.00 | 0.00 | 0.00 | 0.00 | 1.00 | 1.00 | 1.00 | 1.00 | 1.00 | 0.91 | 0.75 | 1.00 | 0.99 | 0.82 | 0.82 | 0.80 | 0.73 | 0.84 | 0.58 | 0.00 | 0.00 | 0.00 | 0.00 | 0.00 | 0.00 |    |    |    |    |    |
| 465 | 1.00 | 0.64 | 0.52 | 0.80 | 0.99 | 0.98 | 0.75 | 0.71 | 0.58 | 0.69 | 0.90 | 0.96 | 1.00 | 0.97 | 0.00 | 0.00 | 0.00 | 0.00 | 0.00 | 0.00 | 0.00 | 0.00 | 0.99 | 0.94 | 0.87 | 0.96 | 0.99 | 0.91 | 0.57 | 0.97 | 0.55 | 0.27 | 0.30 | 0.52 | 0.73 | 0.84 | 0.01 | 0.00 | 0.00 | 0.00 | 0.00 | 0.00 | 0.00 |    |    |    |    |    |

Table S3: Table of significant differences of each treatment's  $ECe^{Soil}$  per depth(column) relative to the control plot on the same time (row). The values indicate the  $p$  values and are coloured whereas dark green differs highly significantly ( $p<0.001$ ), light green differs significantly ( $p<0.05$ ) and yellow differs low significantly ( $p<0.2$ ). The colors for orange ( $p<0.5$ ) light red ( $p<0.9$ ) and dark red ( $p>0.9$ ) are used to highlight nonsignificant differences.

| DAF | Na   |      |      |      |      |      |      | Nb   |      |      |      |      |      |      | Nc   |      |      |      |      |      |      | KCl <sub>a</sub> |      |      |      |      |      |      | KCl <sub>b</sub> |      |      |      |      |      |      | KCl <sub>c</sub> |      |      |      |      |      |      |
|-----|------|------|------|------|------|------|------|------|------|------|------|------|------|------|------|------|------|------|------|------|------|------------------|------|------|------|------|------|------|------------------|------|------|------|------|------|------|------------------|------|------|------|------|------|------|
|     | 10   | 20   | 30   | 40   | 60   | 80   | 100  | 10   | 20   | 30   | 40   | 60   | 80   | 100  | 10   | 20   | 30   | 40   | 60   | 80   | 100  | 10               | 20   | 30   | 40   | 60   | 80   | 100  | 10               | 20   | 30   | 40   | 60   | 80   | 100  | 10               | 20   | 30   | 40   | 60   | 80   | 100  |
| 0   | 1.00 | 1.00 | 1.00 | 1.00 | 1.00 | 1.00 | 1.00 | 1.00 | 1.00 | 1.00 | 1.00 | 1.00 | 1.00 | 1.00 | 1.00 | 1.00 | 1.00 | 1.00 | 1.00 | 1.00 | 1.00 | 1.00             | 1.00 | 1.00 | 1.00 | 1.00 | 1.00 | 1.00 | 1.00             | 1.00 | 1.00 | 1.00 | 1.00 | 1.00 | 1.00 | 1.00             | 1.00 | 1.00 | 1.00 | 1.00 | 1.00 | 1.00 |
| 36  | 1.00 | 1.00 | 1.00 | 1.00 | 1.00 | 1.00 | 1.00 | 1.00 | 1.00 | 1.00 | 1.00 | 1.00 | 1.00 | 1.00 | 0.80 | 0.50 | 0.20 | 0.60 | 1.00 | 1.00 | 1.00 | 1.00             | 1.00 | 1.00 | 1.00 | 1.00 | 1.00 | 1.00 | 0.30             | 0.60 | 0.90 | 1.00 | 1.00 | 1.00 | 1.00 | 0.00             | 0.10 | 0.60 | 1.00 | 1.00 | 1.00 | 1.00 |
| 66  | 0.70 | 1.00 | 1.00 | 1.00 | 1.00 | 1.00 | 1.00 | 0.20 | 0.50 | 1.00 | 1.00 | 1.00 | 1.00 | 0.20 | 0.10 | 0.30 | 1.00 | 1.00 | 1.00 | 1.00 | 1.00 | 1.00             | 0.70 | 0.70 | 1.00 | 1.00 | 1.00 | 0.50 | 0.90             | 0.70 | 0.60 | 1.00 | 1.00 | 1.00 | 0.30 | 0.60             | 0.40 | 0.30 | 1.00 | 1.00 | 1.00 |      |
| 102 | 1.00 | 0.70 | 1.00 | 0.90 | 1.00 | 0.90 | 1.00 | 0.80 | 1.00 | 1.00 | 0.60 | 0.60 | 1.00 | 1.00 | 0.00 | 0.00 | 0.10 | 0.00 | 0.10 | 0.30 | 1.00 | 0.70             | 0.50 | 0.80 | 0.80 | 1.00 | 1.00 | 0.40 | 0.20             | 0.70 | 0.80 | 0.70 | 1.00 | 1.00 | 0.70 | 0.50             | 0.00 | 0.10 | 0.00 | 0.00 | 0.10 | 0.00 |
| 135 | 1.00 | 0.90 | 1.00 | 1.00 | 0.80 | 1.00 | 1.00 | 0.80 | 0.70 | 0.70 | 0.80 | 0.90 | 1.00 | 1.00 | 0.10 | 0.00 | 0.00 | 0.20 | 0.00 | 0.00 | 0.80 | 1.00             | 0.90 | 1.00 | 1.00 | 1.00 | 0.70 | 0.70 | 0.40             | 0.50 | 0.80 | 1.00 | 1.00 | 0.80 | 1.00 | 0.40             | 0.00 | 0.10 | 0.30 | 0.20 | 0.40 | 0.40 |
| 193 | 1.00 | 1.00 | 1.00 | 1.00 | 1.00 | 0.80 | 1.00 | 0.10 | 0.40 | 0.60 | 0.80 | 0.80 | 0.90 | 1.00 | 0.00 | 0.00 | 0.10 | 0.10 | 0.10 | 0.10 | 0.70 | 0.90             | 0.90 | 1.00 | 1.00 | 1.00 | 1.00 | 1.00 | 0.80             | 0.80 | 0.90 | 0.90 | 1.00 | 1.00 | 1.00 | 0.10             | 0.10 | 0.20 | 0.10 | 0.30 | 0.20 | 0.70 |
| 310 | 1.00 | 1.00 | 1.00 | 1.00 | 1.00 | 1.00 | 1.00 | 1.00 | 1.00 | 1.00 | 0.50 | 0.50 | 0.90 | 0.30 | 0.10 | 0.50 | 0.20 | 0.00 | 0.10 | 0.20 | 0.10 | 1.00             | 1.00 | 1.00 | 1.00 | 1.00 | 1.00 | 0.80 | 0.80             | 0.70 | 0.90 | 0.40 | 0.30 | 0.90 | 0.50 | 0.40             | 0.20 | 0.10 | 0.00 | 0.00 | 0.00 | 0.00 |
| 400 | 0.80 | 0.90 | 0.20 | 1.00 | 0.90 | 1.00 | 1.00 | 0.70 | 0.30 | 0.80 | 1.00 | 0.70 | 0.40 | 0.90 | 0.10 | 0.00 | 0.10 | 0.10 | 0.00 | 0.00 | 0.20 | 0.10             | 0.60 | 0.90 | 1.00 | 0.90 | 0.70 | 0.90 | 0.90             | 0.80 | 0.60 | 0.90 | 0.50 | 0.70 | 0.90 | 0.40             | 0.10 | 0.00 | 0.10 | 0.00 | 0.00 | 0.10 |
| 465 | 1.00 | 1.00 | 1.00 | 1.00 | 1.00 | 1.00 | 1.00 | 1.00 | 1.00 | 1.00 | 1.00 | 0.70 | 0.60 | 0.80 | 0.10 | 0.20 | 0.30 | 0.30 | 0.00 | 0.00 | 0.00 | 1.00             | 1.00 | 1.00 | 0.90 | 1.00 | 1.00 | 1.00 | 1.00             | 1.00 | 1.00 | 1.00 | 0.60 | 0.70 | 0.40 | 0.20             | 0.70 | 0.80 | 0.80 | 0.10 | 0.20 | 0.10 |

**Table S4: Table of significant differences of each treatment's Nitrate content per depth (column) relative to the control plot on the same time (row). The values indicate the  $p$  values and are coloured whereas dark green differs highly significantly ( $p<0.001$ ), light green differs significantly ( $p<0.05$ ) and yellow differs low significantly ( $p<0.2$ ). The colors for orange ( $p<0.5$ ) light red ( $p<0.9$ ) and dark red ( $p>0.9$ ) are used to highlight nonsignificant differences.**

| DAF | Na   |      |      |      |      |      |      | Nb   |      |      |      |      |      |      | Nc   |      |      |      |      |      |      |
|-----|------|------|------|------|------|------|------|------|------|------|------|------|------|------|------|------|------|------|------|------|------|
|     | 10   | 20   | 30   | 40   | 60   | 80   | 100  | 10   | 20   | 30   | 40   | 60   | 80   | 100  | 10   | 20   | 30   | 40   | 60   | 80   | 100  |
| 0   | 1.00 | 1.00 | 1.00 | 1.00 | 1.00 | 1.00 | 1.00 | 1.00 | 1.00 | 1.00 | 1.00 | 1.00 | 1.00 | 1.00 | 1.00 | 1.00 | 1.00 | 1.00 | 1.00 | 1.00 | 1.00 |
| 36  | 0.45 | 0.68 | 0.99 | 0.27 | 1.00 | 1.00 | 1.00 | 0.14 | 0.27 | 0.65 | 0.88 | 1.00 | 1.00 | 1.00 | 0.06 | 0.02 | 0.14 | 0.77 | 1.00 | 1.00 | 1.00 |
| 66  | 0.67 | 0.60 | 0.60 | 0.74 | 1.00 | 1.00 | 1.00 | 0.22 | 0.67 | 0.86 | 0.39 | 1.00 | 1.00 | 1.00 | 0.01 | 0.02 | 0.03 | 0.05 | 1.00 | 1.00 | 1.00 |
| 102 | 0.53 | 0.53 | 0.45 | 0.86 | 0.74 | 0.86 | 0.93 | 0.22 | 0.32 | 0.39 | 0.39 | 0.32 | 0.60 | 0.84 | 0.22 | 0.01 | 0.01 | 0.02 | 0.02 | 0.03 | 0.45 |
| 135 | 1.00 | 0.97 | 0.99 | 0.75 | 0.94 | 0.99 | 0.89 | 0.22 | 0.39 | 0.32 | 0.31 | 0.45 | 0.67 | 0.16 | 0.14 | 0.03 | 0.03 | 0.02 | 0.03 | 0.09 | 0.09 |
| 193 | 0.99 | 0.86 | 0.68 | 0.86 | 0.94 | 0.86 | 1.00 | 0.17 | 0.22 | 0.27 | 0.22 | 0.27 | 0.22 | 0.60 | 0.08 | 0.02 | 0.02 | 0.02 | 0.02 | 0.02 | 0.06 |
| 310 | 0.94 | 0.94 | 0.90 | 0.98 | 0.82 | 0.93 | 0.86 | 0.67 | 0.97 | 0.24 | 0.65 | 0.79 | 0.72 | 0.80 | 0.05 | 0.08 | 0.02 | 0.12 | 0.20 | 0.16 | 0.22 |
| 400 | 0.94 | 0.97 | 0.85 | 0.98 | 0.94 | 0.74 | 0.99 | 0.97 | 0.88 | 1.00 | 1.00 | 0.60 | 0.90 | 0.45 | 0.32 | 0.07 | 0.43 | 0.25 | 0.27 | 0.22 | 0.19 |
| 465 | 0.53 | 1.00 | 0.99 | 0.84 | 1.00 | 1.00 | 0.99 | 0.82 | 0.97 | 0.87 | 0.84 | 0.45 | 0.63 | 0.53 | 0.06 | 0.22 | 0.09 | 0.27 | 0.06 | 0.08 | 0.07 |

1
